# Supplementary material for: A Selective and Accurate LC-MS/MS Method for Simultaneous Quantification of Valsartan and Hydrochlorothiazide in Human Plasma
Source: MDPI journal article supplement (doi:10.3390/separations10020119), 2023-02-08
Supplement: s1 [file s1]

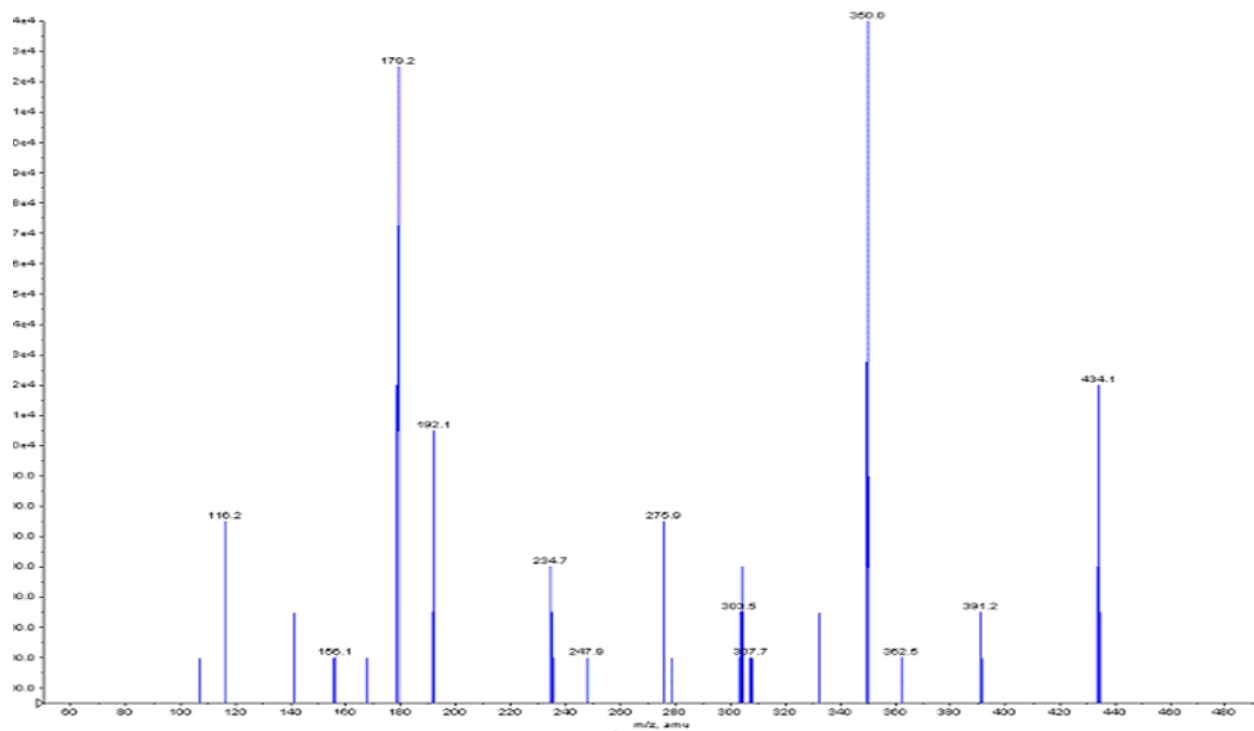

Figure S1a: Precursor to product ion spectra of VAL

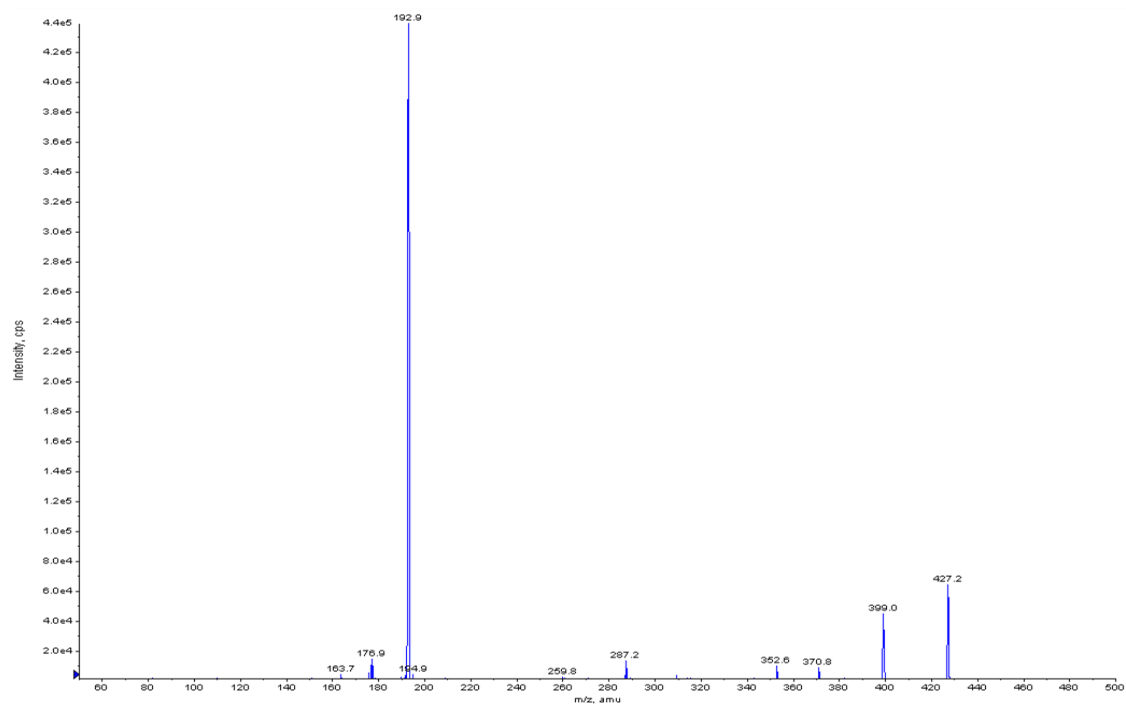

Figure S1b: Precursor to product ion spectra of IRB (IS)

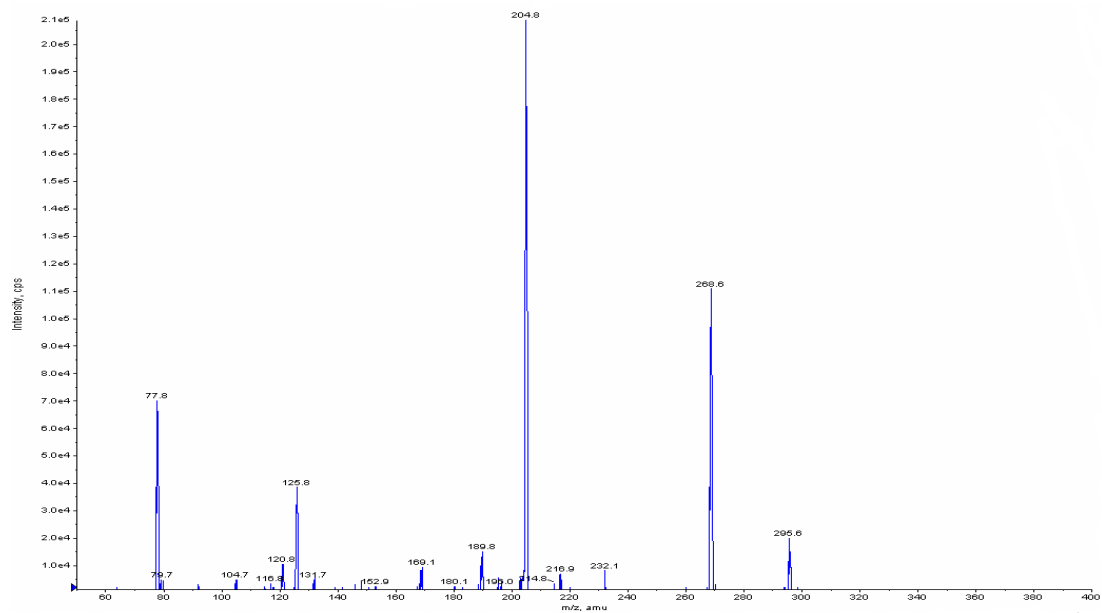

Figure S1c: Precursor to product ion spectra of HCTZ

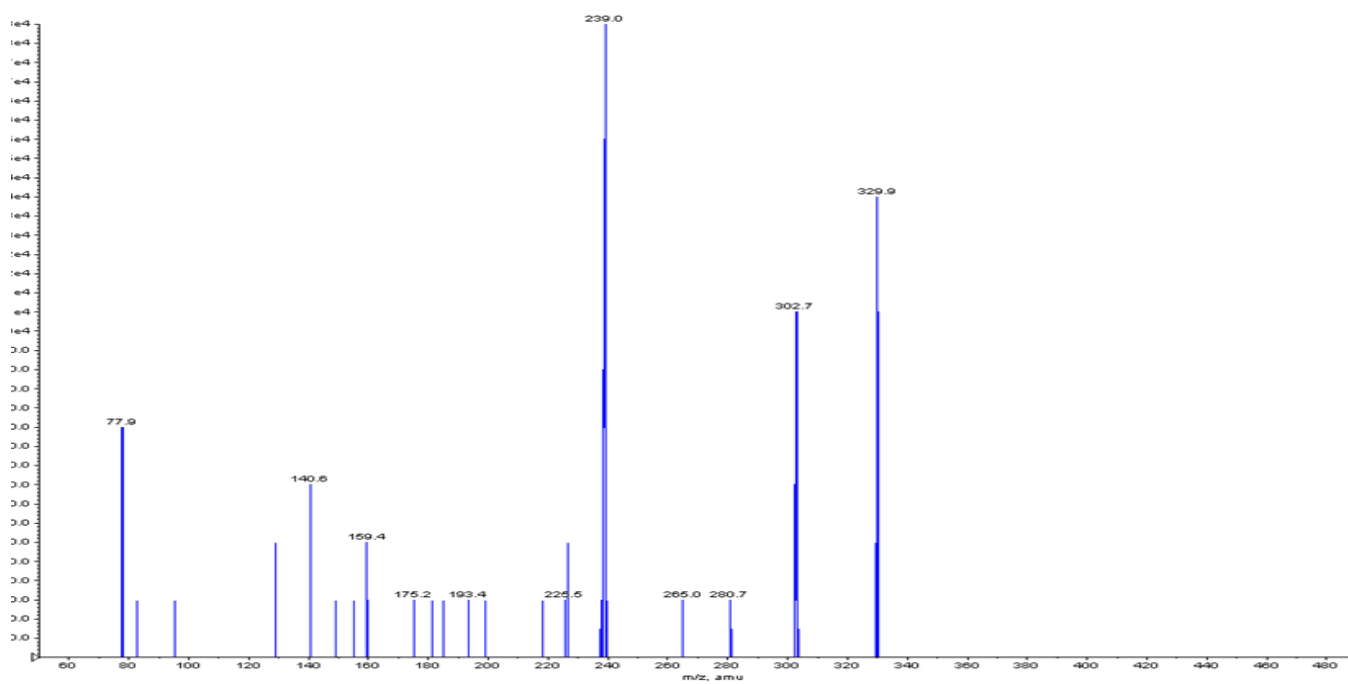

Precursor to product ion spectra of HFMZ(IS)

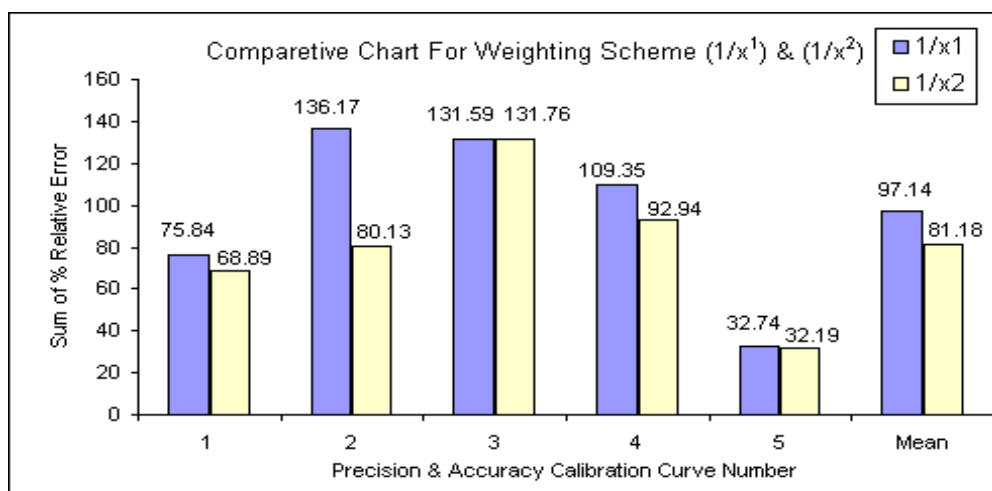

Figure S2a: Good for fit for VAL

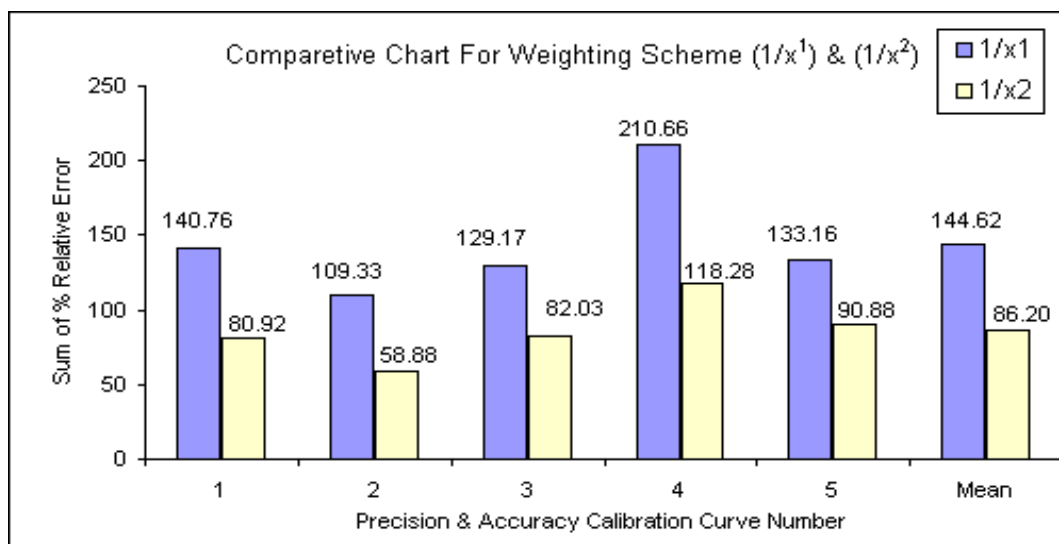

Figure S2b: Good for fit for HCTZ

**Table S1: Stability Studies**

*Refrigerated stock solution stability:* The result of the studies reported in terms of mean value, % CV, SD, % change, and % stability of drugs and internal standards. The result of the experiment is shown in table-3.

|             | Refrigerated Stock Solution Stability of Hydrochlorothiazide (12 Days) |                                               |                                                  |
|-------------|------------------------------------------------------------------------|-----------------------------------------------|--------------------------------------------------|
|             | Response of stability stock (232.470 ng/ml)                            | Response of comparison stock (217.600 ng/ml)  | Corrected response of stability stock (CF-0.94). |
| Mean (n=6)  | 975996.5                                                               | 905292.5                                      | 913566.65                                        |
| SD          | 55673.53                                                               | 64038.74                                      | 52112.356                                        |
| %CV         | 5.70                                                                   | 7.07                                          | 5.70                                             |
| % Change    | 0.91                                                                   |                                               |                                                  |
| % Stability | 100.91                                                                 |                                               |                                                  |
|             | Refrigerated Stock Solution Stability of HFMZ (12 Days)                |                                               |                                                  |
|             | Response of stability stock(1989.560 ng/ml)                            | Response of comparison stock (1989.590 ng/ml) | Corrected response of stability stock (CF-1.0).  |
| Mean(n=6)   | 231578.5                                                               | 213543.3                                      | 231581.99                                        |
| SD          | 13219.02                                                               | 16076.29                                      | 13219.224                                        |
| %CV         | 5.71                                                                   | 7.53                                          | 5.71                                             |
| % Change    | 8.45                                                                   |                                               |                                                  |
| % Stability | 108.45                                                                 |                                               |                                                  |
|             | Refrigerated Stock Solution Stability of Valsartan (12 Days)           |                                               |                                                  |
|             | Response of stability stock (187.760 ng/ml)                            | Response of comparison stock (181.500 ng/ml)  | Corrected response of stability stock (CF-0.96). |
| Mean(n=6)   | 6827226.3                                                              | 6654127.2                                     | 6599603.64                                       |
| SD          | 281962.68                                                              | 258381.43                                     | 272561.924                                       |
| %CV         | 4.13                                                                   | 3.88                                          | 4.13                                             |

|             |                                                        |                                              |                                                  |
|-------------|--------------------------------------------------------|----------------------------------------------|--------------------------------------------------|
| % Change    | 0.82                                                   |                                              |                                                  |
| % Stability | 99.18                                                  |                                              |                                                  |
|             | Refrigerated Stock Solution Stability of IRB (12 Days) |                                              |                                                  |
|             | Response of stability stock (1071.42 ng/ml)            | Response of comparison stock (1061.33 ng/ml) | Corrected response of stability stock (CF-0.99). |
| Mean(n=6)   | 1370025.3                                              | 1237299.8                                    | 1357123.24                                       |
| SD          | 98231.52                                               | 111785.74                                    | 97306.435                                        |
| %CV         | 7.17                                                   | 9.03                                         | 7.17                                             |
| % Change    | 9.68                                                   |                                              |                                                  |
| % Stability | 109.68                                                 |                                              |                                                  |
